# Supplementary material
Source: PubMed Central journal article supplement (PMC7932849)
Supplement: NIHMS1627311-supplement-Supplementary_Tables.pdf [file NIHMS1627311-supplement-Supplementary_Tables.pdf]

**Table S1: Definitions for various fruit and vegetable subgroups based on individual items in the FFQ**

| <b>Sub-groups</b>                       | <b>Individual foods</b>                                                                                                                                                                                                                                                                                                                                                                                                                                                                                                                                                                                                                                                                                                                                                                                                                          |
|-----------------------------------------|--------------------------------------------------------------------------------------------------------------------------------------------------------------------------------------------------------------------------------------------------------------------------------------------------------------------------------------------------------------------------------------------------------------------------------------------------------------------------------------------------------------------------------------------------------------------------------------------------------------------------------------------------------------------------------------------------------------------------------------------------------------------------------------------------------------------------------------------------|
| Total Fruits                            | Grapes (1/2 cup)/raisins (2 tbsps.), prunes (1/2 cup), bananas (1 medium), cantaloupe/melon (1 cup), apples/pears (1), oranges (1 small), grapefruit (1/2), strawberries (1 1/4 cup), blueberries (3/4 cup), peaches/plums/apricots (1/2 cup), watermelon (1 cup)*, apple sauce (1/2 cup)*, dried fruits (1/4 cup)*                                                                                                                                                                                                                                                                                                                                                                                                                                                                                                                              |
| Total juice                             | Apple juice/cider (1/2 cup), orange juice (1/2 cup), grapefruit juice (1/2 cup)*, other fruit juices (1/2 cup), prune juice (1/3 cup)*                                                                                                                                                                                                                                                                                                                                                                                                                                                                                                                                                                                                                                                                                                           |
| Total vegetables                        | Raw spinach (1 cup), cooked spinach (1/2 cup), iceberg or head lettuce (1 cup), romaine or leaf lettuce (1 cup), raw carrots (1 large), cooked carrots (1/2 cup), yams/sweet potatoes (cooked, 1/2 cup), winter squash (dark orange squash) (cooked, 1/2 cup), tomatoes (1 medium), tomato sauce (1/3 cup), salsa (1/2 cup), tomato juice (1/2 cup), broccoli (cooked, 1/2 cup), cabbage/Cole slaw (cooked, 1/2 cup), cauliflower (cooked, 1/2 cup), Brussels sprouts (cooked, 1/2 cup), kale/mustard greens/chard (cooked, 1/2 cup), corn (cooked, 1/2 cup), mixed vegetables (cooked, 1/2 cup), eggplant/zucchini/other summer squash (cooked, 1/2 cup), celery (1 cup), green pepper (1/2 cup)*, onion (1/2 cup)*, green beans (1/2 cup), peas (1/2 cup), mushroom*, beet (cooked, 1/2 cup)*, alfalfa sprouts (1 cup)*, sauerkraut (1/2 cup)* |
| Green leafy vegetables                  | Raw spinach, cooked spinach, iceberg or head lettuce, romaine or leaf lettuce                                                                                                                                                                                                                                                                                                                                                                                                                                                                                                                                                                                                                                                                                                                                                                    |
| Yellow/orange vegetables                | Raw carrots, cooked carrots, yams/sweet potatoes, winter squash                                                                                                                                                                                                                                                                                                                                                                                                                                                                                                                                                                                                                                                                                                                                                                                  |
| Tomato                                  | Tomatoes, tomato sauce, salsa, tomato juice                                                                                                                                                                                                                                                                                                                                                                                                                                                                                                                                                                                                                                                                                                                                                                                                      |
| Cruciferous vegetables                  | Broccoli, cabbage/Cole slaw, cauliflower, Brussels sprouts, kale/mustard greens/chard                                                                                                                                                                                                                                                                                                                                                                                                                                                                                                                                                                                                                                                                                                                                                            |
| Other vegetables                        | Corn, mixed vegetables, eggplant/zucchini/other summer squash, celery, green pepper*, onion*, green beans, peas, mushroom*, beet*, alfalfa sprouts*                                                                                                                                                                                                                                                                                                                                                                                                                                                                                                                                                                                                                                                                                              |
| Fruits and vegetables high in vitamin C | Cantaloupe, orange, grapefruit, strawberries, broccoli, cabbage/Cole slaw, cauliflower, Brussels sprouts, kale/mustard greens/chard, green peppers                                                                                                                                                                                                                                                                                                                                                                                                                                                                                                                                                                                                                                                                                               |
| Vegetables high in $\alpha$ -carotene   | Raw carrots, cooked carrots                                                                                                                                                                                                                                                                                                                                                                                                                                                                                                                                                                                                                                                                                                                                                                                                                      |
| Vegetables high in $\beta$ -carotene    | Raw carrots, cooked carrots, yams/ sweet potatoes, raw spinach, cooked spinach, iceberg or head lettuce, romaine or leaf lettuce, kale/mustard greens/chard                                                                                                                                                                                                                                                                                                                                                                                                                                                                                                                                                                                                                                                                                      |
| Vegetables high in lutein               | Raw spinach, cooked spinach, kale/mustard greens/chard                                                                                                                                                                                                                                                                                                                                                                                                                                                                                                                                                                                                                                                                                                                                                                                           |

\*Data are not available in all FFQs

**Table S2: Post-diagnostic subgroup of fruit and vegetable consumption in relation to mortality after breast cancer diagnosis in the Nurses' Health Study and Nurses' Health Study II.**

|                                                        | Consumption Levels |                  |                  |                  |                  | <i>P</i> <sub>trend</sub> |
|--------------------------------------------------------|--------------------|------------------|------------------|------------------|------------------|---------------------------|
|                                                        | Quintile 1         | Quintile 2       | Quintile 3       | Quintile 4       | Quintile 5       |                           |
| <b>Fruits and vegetables high in vitamin C</b>         |                    |                  |                  |                  |                  |                           |
| Median intake, servings/day                            | 0.3                | 0.5              | 0.8              | 1.1              | 1.7              |                           |
| Breast cancer-specific mortality                       |                    |                  |                  |                  |                  |                           |
| Number of deaths                                       | 213                | 199              | 201              | 206              | 251              |                           |
| Model 1                                                | 1                  | 0.88 (0.73-1.07) | 0.86 (0.71-1.05) | 0.87 (0.72-1.05) | 1.04 (0.86-1.25) | 0.36                      |
| Model 2                                                | 1                  | 1.00 (0.82-1.21) | 1.09 (0.89-1.33) | 1.01 (0.83-1.24) | 1.09 (0.90-1.33) | 0.39                      |
| All-cause mortality                                    |                    |                  |                  |                  |                  |                           |
| Number of deaths                                       | 584                | 481              | 502              | 469              | 484              |                           |
| Model 1                                                | 1                  | 0.83 (0.73-0.93) | 0.85 (0.75-0.95) | 0.79 (0.69-0.89) | 0.78 (0.69-0.88) | 0.0003                    |
| Model 2                                                | 1                  | 0.91 (0.80-1.03) | 0.95 (0.84-1.08) | 0.87 (0.76-0.98) | 0.86 (0.75-0.98) | 0.02                      |
| <b>Vegetables high in <math>\alpha</math>-carotene</b> |                    |                  |                  |                  |                  |                           |
| Median intake, servings/day                            | 0.04               | 0.1              | 0.2              | 0.3              | 0.5              |                           |
| Breast cancer-specific mortality                       |                    |                  |                  |                  |                  |                           |
| Number of deaths                                       | 226                | 242              | 190              | 196              | 214              |                           |
| Model 1                                                | 1                  | 0.94 (0.78-1.13) | 0.82 (0.67-0.99) | 0.77 (0.63-0.93) | 0.87 (0.72-1.05) | 0.10                      |
| Model 2                                                | 1                  | 1.09 (0.90-1.31) | 1.13 (0.92-1.38) | 1.13 (0.92-1.38) | 1.14 (0.93-1.40) | 0.26                      |
| All-cause mortality                                    |                    |                  |                  |                  |                  |                           |
| Number of deaths                                       | 549                | 543              | 454              | 483              | 487              |                           |
| Model 1                                                | 1                  | 0.89 (0.79-1.00) | 0.84 (0.74-0.95) | 0.81 (0.72-0.92) | 0.80 (0.71-0.91) | 0.001                     |
| Model 2                                                | 1                  | 1.02 (0.90-1.15) | 1.02 (0.89-1.16) | 0.98 (0.86-1.12) | 1.01 (0.89-1.16) | 0.98                      |
| <b>Vegetables high in <math>\beta</math>-carotene</b>  |                    |                  |                  |                  |                  |                           |
| Median intake, servings/day                            | 0.4                | 0.8              | 1.1              | 1.5              | 2.2              |                           |
| Breast cancer-specific mortality                       |                    |                  |                  |                  |                  |                           |
| Number of deaths                                       | 257                | 233              | 196              | 202              | 182              |                           |
| Model 1                                                | 1                  | 0.86 (0.72-1.03) | 0.72 (0.60-0.86) | 0.77 (0.64-0.92) | 0.74 (0.61-0.89) | 0.002                     |
| Model 2                                                | 1                  | 1.01 (0.84-1.21) | 0.94 (0.77-1.14) | 0.99 (0.82-1.21) | 0.90 (0.73-1.10) | 0.29                      |
| All-cause mortality                                    |                    |                  |                  |                  |                  |                           |
| Number of deaths                                       | 642                | 564              | 479              | 438              | 398              |                           |
| Model 1                                                | 1                  | 0.87 (0.77-0.97) | 0.74 (0.66-0.83) | 0.69 (0.61-0.78) | 0.67 (0.59-0.76) | <0.0001                   |
| Model 2                                                | 1                  | 0.95 (0.85-1.07) | 0.88 (0.78-1.00) | 0.79 (0.70-0.90) | 0.80 (0.70-0.91) | <0.0001                   |
| <b>Vegetables high in lutein</b>                       |                    |                  |                  |                  |                  |                           |
| Median intake, servings/day                            | 0                  | 0.07             | 0.1              | 0.3              |                  |                           |
| Breast cancer-specific mortality                       |                    |                  |                  |                  |                  |                           |
| Number of deaths                                       | 255                | 279              | 282              | 249              |                  |                           |
| Model 1                                                | 1                  | 0.96 (0.81-1.13) | 1.00 (0.84-1.18) | 0.97 (0.81-1.16) |                  | 0.86                      |
| Model 2                                                | 1                  | 1.04 (0.87-1.23) | 1.18 (0.99-1.40) | 1.12 (0.93-1.34) |                  | 0.19                      |
| All-cause mortality                                    |                    |                  |                  |                  |                  |                           |
| Number of deaths                                       | 707                | 697              | 609              | 497              |                  |                           |
| Model 1                                                | 1                  | 0.91 (0.82-1.01) | 0.87 (0.78-0.97) | 0.82 (0.73-0.92) |                  | 0.0006                    |
| Model 2                                                | 1                  | 0.92 (0.82-1.02) | 0.98 (0.87-1.09) | 0.92 (0.82-1.04) |                  | 0.36                      |

See Table 2 footnote

**Table S3: Post-diagnostic subgroup of fruit and vegetable consumption in relation to cardiovascular disease mortality after breast cancer diagnosis in the Nurses' Health Study and Nurses' Health Study II.**

|                                                        | Consumption Levels |                  |                  |                  |                  | <i>P</i> <sub>trend</sub> |
|--------------------------------------------------------|--------------------|------------------|------------------|------------------|------------------|---------------------------|
|                                                        | Quintile 1         | Quintile 2       | Quintile 3       | Quintile 4       | Quintile 5       |                           |
| <b>Total fruits and vegetables</b>                     |                    |                  |                  |                  |                  |                           |
| Median intake, servings/day                            | 2.2                | 3.4              | 4.3              | 5.5              | 7.4              |                           |
| Number of deaths                                       | 70                 | 86               | 50               | 53               | 52               |                           |
| Model 1                                                | 1                  | 1.18 (0.86-1.62) | 0.70 (0.49-1.01) | 0.76 (0.53-1.09) | 0.75 (0.52-1.07) | 0.02                      |
| Model 2                                                | 1                  | 1.24 (0.90-1.72) | 0.86 (0.59-1.26) | 0.96 (0.65-1.42) | 0.96 (0.63-1.45) | 0.48                      |
| <b>Total fruits</b>                                    |                    |                  |                  |                  |                  |                           |
| Median intake, servings/day                            | 0.5                | 1.0              | 1.4              | 1.9              | 2.8              |                           |
| Number of deaths                                       | 52                 | 67               | 58               | 59               | 75               |                           |
| Model 1                                                | 1                  | 1.15 (0.80-1.65) | 0.90 (0.62-1.30) | 0.86 (0.59-1.25) | 1.02 (0.71-1.46) | 0.74                      |
| Model 2                                                | 1                  | 1.27 (0.88-1.84) | 1.01 (0.68-1.49) | 1.11 (0.75-1.65) | 1.27 (0.85-1.88) | 0.39                      |
| <b>Total vegetables</b>                                |                    |                  |                  |                  |                  |                           |
| Median intake, servings/day                            | 1.4                | 2.2              | 2.9              | 3.6              | 5.1              |                           |
| Number of deaths                                       | 85                 | 78               | 62               | 49               | 37               |                           |
| Model 1                                                | 1                  | 0.96 (0.71-1.31) | 0.82 (0.59-1.15) | 0.67 (0.47-0.96) | 0.55 (0.37-0.82) | 0.0005                    |
| Model 2                                                | 1                  | 1.08 (0.79-1.49) | 0.98 (0.69-1.39) | 0.77 (0.53-1.12) | 0.76 (0.49-1.16) | 0.08                      |
| <b>Fruit juices</b>                                    |                    |                  |                  |                  |                  |                           |
| Median intake, servings/day                            | 0                  | 0.3              | 0.8              | 1.5              | 2.1              |                           |
| Number of deaths                                       | 48                 | 57               | 67               | 67               | 72               |                           |
| Model 1                                                | 1                  | 1.16 (0.79-1.71) | 1.18 (0.81-1.71) | 0.97 (0.67-1.41) | 1.08 (0.75-1.56) | 0.81                      |
| Model 2                                                | 1                  | 1.11 (0.74-1.65) | 1.15 (0.78-1.68) | 1.00 (0.68-1.47) | 1.24 (0.84-1.83) | 0.48                      |
| <b>Green leafy vegetables</b>                          |                    |                  |                  |                  |                  |                           |
| Median intake, servings/day                            | 0.2                | 0.5              | 0.8              | 1.1              | 1.7              |                           |
| Number of deaths                                       | 95                 | 72               | 58               | 41               | 45               |                           |
| Model 1                                                | 1                  | 0.82 (0.60-1.11) | 0.65 (0.47-0.91) | 0.48 (0.33-0.69) | 0.60 (0.42-0.86) | 0.0003                    |
| Model 2                                                | 1                  | 0.97 (0.71-1.34) | 0.73 (0.52-1.03) | 0.57 (0.39-0.83) | 0.79 (0.54-1.16) | 0.03                      |
| <b>Yellow/orange vegetables</b>                        |                    |                  |                  |                  |                  |                           |
| Median intake, servings/day                            | 0.1                | 0.2              | 0.3              | 0.4              | 0.7              |                           |
| Number of deaths                                       | 66                 | 60               | 85               | 52               | 48               |                           |
| Model 1                                                | 1                  | 0.86 (0.61-1.22) | 1.18 (0.85-1.63) | 0.80 (0.55-1.15) | 0.65 (0.44-0.94) | 0.01                      |
| Model 2                                                | 1                  | 1.00 (0.70-1.43) | 1.35 (0.96-1.89) | 0.94 (0.64-1.38) | 0.86 (0.57-1.28) | 0.27                      |
| <b>Tomatoes</b>                                        |                    |                  |                  |                  |                  |                           |
| Median intake, servings/day                            | 0.2                | 0.3              | 0.5              | 0.7              | 1.1              |                           |
| Number of deaths                                       | 79                 | 60               | 63               | 61               | 48               |                           |
| Model 1                                                | 1                  | 0.90 (0.64-1.26) | 0.93 (0.66-1.30) | 0.97 (0.69-1.38) | 0.82 (0.57-1.19) | 0.40                      |
| Model 2                                                | 1                  | 0.89 (0.63-1.26) | 0.99 (0.70-1.41) | 1.16 (0.80-1.67) | 1.06 (0.71-1.57) | 0.46                      |
| <b>Cruciferous vegetables</b>                          |                    |                  |                  |                  |                  |                           |
| Median intake, servings/day                            | 0.1                | 0.2              | 0.4              | 0.5              | 0.9              |                           |
| Number of deaths                                       | 80                 | 72               | 65               | 47               | 47               |                           |
| Model 1                                                | 1                  | 1.01 (0.74-1.40) | 0.93 (0.66-1.29) | 0.75 (0.52-1.08) | 0.72 (0.50-1.04) | 0.03                      |
| Model 2                                                | 1                  | 1.04 (0.75-1.44) | 1.01 (0.72-1.41) | 0.83 (0.56-1.21) | 0.81 (0.55-1.19) | 0.14                      |
| <b>Other vegetables</b>                                |                    |                  |                  |                  |                  |                           |
| Median intake, servings/day                            | 0.3                | 0.5              | 0.7              | 1.0              | 1.5              |                           |
| Number of deaths                                       | 71                 | 72               | 69               | 56               | 43               |                           |
| Model 1                                                | 1                  | 1.11 (0.80-1.54) | 1.07 (0.77-1.50) | 0.91 (0.64-1.30) | 0.76 (0.52-1.11) | 0.07                      |
| Model 2                                                | 1                  | 1.05 (0.75-1.48) | 1.06 (0.75-1.50) | 0.99 (0.68-1.44) | 0.85 (0.56-1.29) | 0.37                      |
| <b>Fruits and vegetables high in vitamin C</b>         |                    |                  |                  |                  |                  |                           |
| Median intake, servings/day                            | 0.3                | 0.5              | 0.8              | 1.1              | 1.7              |                           |
| Number of deaths                                       | 74                 | 59               | 56               | 70               | 52               |                           |
| Model 1                                                | 1                  | 0.86 (0.61-1.22) | 0.81 (0.57-1.15) | 1.01 (0.72-1.40) | 0.70 (0.49-1.00) | 0.13                      |
| Model 2                                                | 1                  | 0.87 (0.62-1.24) | 0.86 (0.60-1.24) | 1.14 (0.80-1.61) | 0.87 (0.59-1.29) | 0.90                      |
| <b>Vegetables high in <math>\alpha</math>-carotene</b> |                    |                  |                  |                  |                  |                           |
| Median intake, servings/day                            | 0.04               | 0.1              | 0.2              | 0.3              | 0.5              |                           |
| Number of deaths                                       | 65                 | 72               | 59               | 65               | 50               |                           |
| Model 1                                                | 1                  | 1.01 (0.72-1.42) | 0.96 (0.68-1.37) | 0.96 (0.68-1.36) | 0.68 (0.47-0.98) | 0.02                      |
| Model 2                                                | 1                  | 1.14 (0.81-1.61) | 1.11 (0.77-1.60) | 1.02 (0.71-1.47) | 0.86 (0.58-1.28) | 0.25                      |

| <b>Vegetables high in <math>\beta</math>-carotene</b> |     |                  |                  |                  |                  |        |
|-------------------------------------------------------|-----|------------------|------------------|------------------|------------------|--------|
| Median intake, servings/day                           | 0.4 | 0.8              | 1.1              | 1.5              | 2.2              |        |
| Number of deaths                                      | 93  | 76               | 52               | 42               | 48               |        |
| Model 1                                               | 1   | 0.84 (0.62-1.13) | 0.58 (0.41-0.82) | 0.48 (0.33-0.69) | 0.60 (0.42-0.85) | 0.0002 |
| Model 2                                               | 1   | 0.92 (0.67-1.25) | 0.67 (0.47-0.95) | 0.55 (0.37-0.80) | 0.78 (0.53-1.14) | 0.04   |
| <b>Vegetables high in lutein</b>                      |     |                  |                  |                  |                  |        |
| Median intake, servings/day                           | 0   | 0.07             | 0.1              | 0.3              |                  |        |
| Number of deaths                                      | 103 | 88               | 70               | 48               |                  |        |
| Model 1                                               | 1   | 0.84 (0.63-1.12) | 0.79 (0.58-1.07) | 0.66 (0.47-0.94) |                  | 0.02   |
| Model 2                                               | 1   | 0.84 (0.63-1.13) | 0.89 (0.65-1.22) | 0.80 (0.56-1.14) |                  | 0.27   |

See Table 2 footnote

**Table S4. Associations of post-diagnostic fruit and vegetable intake with breast cancer-specific and all-cause mortality among breast cancer patients, stratified by participant characteristics and tumor characteristics.**

|                                         | No. of Deaths | Total Fruits and Vegetables       |                      | Total Fruits                      |                      | Total Vegetables                  |                      |
|-----------------------------------------|---------------|-----------------------------------|----------------------|-----------------------------------|----------------------|-----------------------------------|----------------------|
|                                         |               | HR (95% CI)<br>Per 2 servings/day | <i>P</i> interaction | HR (95% CI)<br>Per 2 servings/day | <i>P</i> interaction | HR (95% CI)<br>Per 2 servings/day | <i>P</i> interaction |
| <b>Breast cancer-specific mortality</b> |               |                                   |                      |                                   |                      |                                   |                      |
| <b>Age at diagnosis</b>                 |               |                                   |                      |                                   |                      |                                   |                      |
| <60 years                               | 638           | 1.06 (0.96-1.18)                  | 0.07                 | 1.26 (1.02-1.56)                  | 0.03                 | 1.01 (0.87-1.16)                  | 0.12                 |
| ≥60 years                               | 432           | 0.89 (0.78-1.01)                  |                      | 0.82 (0.63-1.07)                  |                      | 0.85 (0.71-1.01)                  |                      |
| <b>Smoking</b>                          |               |                                   |                      |                                   |                      |                                   |                      |
| Never                                   | 481           | 1.00 (0.89-1.12)                  | 0.32                 | 1.00 (0.78-1.28)                  | 0.59                 | 0.99 (0.84-1.16)                  | 0.18                 |
| Ever                                    | 578           | 0.97 (0.87-1.08)                  |                      | 1.03 (0.82-1.29)                  |                      | 0.90 (0.78-1.05)                  |                      |
| <b>Alcohol consumption</b>              |               |                                   |                      |                                   |                      |                                   |                      |
| <3.5 g/day                              | 730           | 0.98 (0.89-1.08)                  | 0.27                 | 1.02 (0.84-1.24)                  | 0.39                 | 0.95 (0.83-1.08)                  | 0.29                 |
| ≥3.5 g/day                              | 340           | 0.99 (0.85-1.14)                  |                      | 0.99 (0.73-1.34)                  |                      | 0.94 (0.77-1.15)                  |                      |
| <b>Aspirin use</b>                      |               |                                   |                      |                                   |                      |                                   |                      |
| Ever                                    | 801           | 0.95 (0.86-1.04)                  | 0.13                 | 0.95 (0.79-1.16)                  | 0.08                 | 0.90 (0.80-1.02)                  | 0.50                 |
| Never                                   | 178           | 1.07 (0.89-1.30)                  |                      | 1.32 (0.88-1.98)                  |                      | 0.96 (0.73-1.25)                  |                      |
| <b>Body mass index</b>                  |               |                                   |                      |                                   |                      |                                   |                      |
| <25.0 kg/m <sup>2</sup>                 | 450           | 0.99 (0.88-1.12)                  | 0.65                 | 1.02 (0.79-1.33)                  | 0.72                 | 0.96 (0.81-1.14)                  | 0.64                 |
| ≥25.0 kg/m <sup>2</sup>                 | 597           | 0.96 (0.86-1.06)                  |                      | 0.97 (0.78-1.21)                  |                      | 0.92 (0.79-1.06)                  |                      |
| <b>Physical activity</b>                |               |                                   |                      |                                   |                      |                                   |                      |
| <10 MET-hrs/wk                          | 483           | 0.93 (0.82-1.04)                  | 0.53                 | 0.95 (0.74-1.22)                  | 0.69                 | 0.85 (0.72-1.01)                  | 0.31                 |
| ≥10 MET-hrs/wk                          | 440           | 0.95 (0.84-1.07)                  |                      | 0.94 (0.72-1.22)                  |                      | 0.98 (0.83-1.16)                  |                      |
| <b>Estrogen receptor</b>                |               |                                   |                      |                                   |                      |                                   |                      |
| Positive                                | 769           | 0.99 (0.90-1.08)                  | 0.85                 | 1.02 (0.84-1.24)                  | 0.81                 | 0.95 (0.83-1.08)                  | 0.96                 |
| Negative                                | 212           | 0.95 (0.79-1.13)                  |                      | 0.93 (0.64-1.36)                  |                      | 0.95 (0.74-1.22)                  |                      |
| <b>Stage</b>                            |               |                                   |                      |                                   |                      |                                   |                      |
| I                                       | 339           | 0.93 (0.80-1.07)                  | 0.92                 | 0.87 (0.64-1.16)                  | 0.44                 | 0.96 (0.79-1.17)                  | 0.32                 |
| II                                      | 397           | 0.91 (0.79-1.03)                  |                      | 0.94 (0.72-1.24)                  |                      | 0.84 (0.70-1.01)                  |                      |
| III                                     | 334           | 1.05 (0.91-1.21)                  |                      | 1.21 (0.89-1.65)                  |                      | 0.96 (0.79-1.16)                  |                      |
| <b>All-cause mortality</b>              |               |                                   |                      |                                   |                      |                                   |                      |
| <b>Age at diagnosis</b>                 |               |                                   |                      |                                   |                      |                                   |                      |
| <60 years                               | 1,089         | 1.01 (0.93-1.10)                  | 0.03                 | 1.21 (1.02-1.43)                  | 0.006                | 0.95 (0.85-1.06)                  | 0.04                 |
| ≥60 years                               | 1,432         | 0.89 (0.82-0.95)                  |                      | 0.86 (0.74-1.00)                  |                      | 0.83 (0.75-0.91)                  |                      |
| <b>Smoking</b>                          |               |                                   |                      |                                   |                      |                                   |                      |
| Never                                   | 1,000         | 0.97 (0.89-1.05)                  | 0.05                 | 0.90 (0.75-1.07)                  | 0.77                 | 0.97 (0.86-1.08)                  | 0.008                |
| Ever                                    | 1,474         | 0.89 (0.83-0.95)                  |                      | 0.92 (0.80-1.07)                  |                      | 0.82 (0.74-0.90)                  |                      |
| <b>Alcohol consumption</b>              |               |                                   |                      |                                   |                      |                                   |                      |
| <3.5 g/day                              | 1,719         | 0.94 (0.88-1.00)                  | 0.84                 | 0.95 (0.83-1.08)                  | 0.99                 | 0.92 (0.84-1.00)                  | 0.45                 |
| ≥3.5 g/day                              | 802           | 0.90 (0.82-1.00)                  |                      | 0.89 (0.73-1.08)                  |                      | 0.82 (0.71-0.93)                  |                      |
| <b>Aspirin use</b>                      |               |                                   |                      |                                   |                      |                                   |                      |
| Ever                                    | 1,844         | 0.89 (0.84-0.95)                  | 0.08                 | 0.91 (0.80-1.04)                  | 0.24                 | 0.83 (0.76-0.90)                  | 0.11                 |
| Never                                   | 260           | 0.98 (0.83-1.15)                  |                      | 1.00 (0.70-1.41)                  |                      | 0.95 (0.75-1.19)                  |                      |
| <b>Body mass index</b>                  |               |                                   |                      |                                   |                      |                                   |                      |
| <25.0 kg/m <sup>2</sup>                 | 1,106         | 0.88 (0.81-0.96)                  | 0.19                 | 0.85 (0.72-1.00)                  | 0.19                 | 0.85 (0.76-0.95)                  | 0.50                 |
| ≥25.0 kg/m <sup>2</sup>                 | 1,377         | 0.96 (0.89-1.03)                  |                      | 0.98 (0.85-1.14)                  |                      | 0.91 (0.82-1.00)                  |                      |
| <b>Physical activity</b>                |               |                                   |                      |                                   |                      |                                   |                      |
| <10 MET-hrs/wk                          | 1,279         | 0.89 (0.83-0.96)                  | 0.58                 | 0.88 (0.76-1.03)                  | 0.67                 | 0.85 (0.77-0.95)                  | 0.54                 |
| ≥10 MET-hrs/wk                          | 1,010         | 0.89 (0.81-0.96)                  |                      | 0.84 (0.70-1.00)                  |                      | 0.88 (0.78-0.98)                  |                      |
| <b>Estrogen receptor</b>                |               |                                   |                      |                                   |                      |                                   |                      |
| Positive                                | 1,847         | 0.92 (0.87-0.98)                  | 0.59                 | 0.94 (0.83-1.07)                  | 0.35                 | 0.88 (0.81-0.96)                  | 0.79                 |
| Negative                                | 445           | 0.88 (0.77-1.00)                  |                      | 0.82 (0.62-1.08)                  |                      | 0.84 (0.70-1.01)                  |                      |
| <b>Stage</b>                            |               |                                   |                      |                                   |                      |                                   |                      |
| I                                       | 1,279         | 0.88 (0.82-0.95)                  | 0.09                 | 0.79 (0.68-0.93)                  | 0.04                 | 0.86 (0.77-0.95)                  | 0.29                 |
| II                                      | 794           | 0.91 (0.83-1.00)                  |                      | 1.00 (0.82-1.23)                  |                      | 0.86 (0.75-0.98)                  |                      |
| III                                     | 448           | 1.02 (0.89-1.15)                  |                      | 1.22 (0.93-1.60)                  |                      | 0.92 (0.77-1.09)                  |                      |

See Table 2 footnote

**Table S5: Pre-diagnostic fruit and vegetable consumption in relation to mortality after breast cancer diagnosis (n=8,552 women) in the Nurses' Health Study and Nurses' Health Study II.**

|                                   | Consumption Levels |                  |                  |                  |                  | <i>P</i> <sub>trend</sub> |
|-----------------------------------|--------------------|------------------|------------------|------------------|------------------|---------------------------|
|                                   | Quintile 1         | Quintile 2       | Quintile 3       | Quintile 4       | Quintile 5       |                           |
| <b>Total fruit and vegetables</b> |                    |                  |                  |                  |                  |                           |
| Breast cancer-specific mortality  |                    |                  |                  |                  |                  |                           |
| Median intake, servings/day       | 1.9                | 3.0              | 4.0              | 5.2              | 7.4              |                           |
| Number of deaths                  | 215                | 195              | 213              | 191              | 190              |                           |
| Model 1                           | 1                  | 0.91 (0.75-1.10) | 1.00 (0.82-1.21) | 0.88 (0.73-1.08) | 0.89 (0.73-1.09) | 0.26                      |
| Model 2                           | 1                  | 0.92 (0.76-1.13) | 1.09 (0.89-1.33) | 0.98 (0.79-1.21) | 0.97 (0.77-1.21) | 0.88                      |
| All-cause mortality               |                    |                  |                  |                  |                  |                           |
| Number of deaths                  | 475                | 445              | 472              | 506              | 474              |                           |
| Model 1                           | 1                  | 0.85 (0.75-0.97) | 0.89 (0.78-1.01) | 0.88 (0.78-1.00) | 0.83 (0.73-0.94) | 0.02                      |
| Model 2                           | 1                  | 0.94 (0.82-1.07) | 1.04 (0.91-1.19) | 1.04 (0.91-1.19) | 1.00 (0.86-1.15) | 0.70                      |
| <b>Total fruits</b>               |                    |                  |                  |                  |                  |                           |
| Breast cancer-specific mortality  |                    |                  |                  |                  |                  |                           |
| Median intake, servings/day       | 0.3                | 0.8              | 1.2              | 1.8              | 2.8              |                           |
| Number of deaths                  | 207                | 213              | 201              | 188              | 195              |                           |
| Model 1                           | 1                  | 0.98 (0.81-1.19) | 0.92 (0.76-1.12) | 0.83 (0.68-1.01) | 0.85 (0.69-1.03) | 0.04                      |
| Model 2                           | 1                  | 1.08 (0.89-1.32) | 1.13 (0.92-1.38) | 0.88 (0.71-1.08) | 0.93 (0.75-1.15) | 0.13                      |
| All-cause mortality               |                    |                  |                  |                  |                  |                           |
| Number of deaths                  | 444                | 459              | 468              | 485              | 516              |                           |
| Model 1                           | 1                  | 0.89 (0.78-1.01) | 0.86 (0.75-0.98) | 0.82 (0.72-0.94) | 0.81 (0.71-0.93) | 0.003                     |
| Model 2                           | 1                  | 0.96 (0.84-1.10) | 1.05 (0.92-1.20) | 0.92 (0.81-1.06) | 0.96 (0.84-1.10) | 0.44                      |
| <b>Total vegetables</b>           |                    |                  |                  |                  |                  |                           |
| Breast cancer specific mortality  |                    |                  |                  |                  |                  |                           |
| Median intake, servings/day       | 1.2                | 1.9              | 2.6              | 3.5              | 5.1              |                           |
| Number of deaths                  | 215                | 209              | 191              | 215              | 174              |                           |
| Model 1                           | 1                  | 1.01 (0.84-1.23) | 0.94 (0.78-1.15) | 1.06 (0.88-1.28) | 0.88 (0.72-1.07) | 0.27                      |
| Model 2                           | 1                  | 1.01 (0.83-1.22) | 0.92 (0.75-1.13) | 1.17 (0.95-1.44) | 0.94 (0.75-1.17) | 0.89                      |
| All-cause mortality               |                    |                  |                  |                  |                  |                           |
| Number of deaths                  | 485                | 472              | 456              | 516              | 443              |                           |
| Model 1                           | 1                  | 0.96 (0.85-1.09) | 0.91 (0.80-1.04) | 1.01 (0.89-1.15) | 0.87 (0.77-1.00) | 0.10                      |
| Model 2                           | 1                  | 1.04 (0.91-1.19) | 1.02 (0.89-1.17) | 1.22 (1.07-1.40) | 1.02 (0.88-1.17) | 0.45                      |
| <b>Fruit juices</b>               |                    |                  |                  |                  |                  |                           |
| Breast cancer-specific mortality  |                    |                  |                  |                  |                  |                           |
| Median intake, servings/day       | 0                  | 0.2              | 0.7              | 1.5              | 2.0              |                           |
| Number of deaths                  | 232                | 167              | 186              | 235              | 175              |                           |
| Model 1                           | 1                  | 1.03 (0.84-1.26) | 0.96 (0.79-1.16) | 0.96 (0.80-1.15) | 0.91 (0.75-1.11) | 0.28                      |
| Model 2                           | 1                  | 0.98 (0.80-1.20) | 0.95 (0.78-1.15) | 1.01 (0.84-1.21) | 0.99 (0.80-1.21) | 0.92                      |
| All-cause mortality               |                    |                  |                  |                  |                  |                           |
| Number of deaths                  | 540                | 364              | 430              | 560              | 460              |                           |
| Model 1                           | 1                  | 1.03 (0.90-1.17) | 0.99 (0.87-1.12) | 0.97 (0.86-1.09) | 0.95 (0.84-1.08) | 0.27                      |
| Model 2                           | 1                  | 1.02 (0.90-1.17) | 0.97 (0.86-1.11) | 0.98 (0.87-1.11) | 1.02 (0.89-1.16) | 0.95                      |

Model 1 stratified by cohort and adjusted for age at diagnosis (year) and calendar year of diagnosis.

Model 2 stratified by cohort and adjusted for age at diagnosis (year), calendar year of diagnosis, time between diagnosis and first FFQ (year), calendar year at start of follow-up of each-2-year questionnaire cycle, pre-diagnostic BMI (<20, 20 to <22.5, 22.5 to <25, 25.0 to <30, 30 to <35, ≥35 kg/m<sup>2</sup>, missing), BMI change after diagnosis (no change (≥-0.5 to ≤0.5 kg/m<sup>2</sup>), decrease (<-0.5 kg/m<sup>2</sup>), increase (>0.5-2 kg/m<sup>2</sup>), increase (>2 kg/m<sup>2</sup>), missing), post-diagnostic smoking (never, past, current 1-14 cigarettes/day, current 15-24 cigarettes/day, current ≥25 cigarettes/day, missing), post-diagnostic physical activity (<5, 5 to <11.5, 11.5 to <22, ≥22 MET-h/week, missing), pre-diagnostic oral contraceptive use (ever, never), pre-diagnostic alcohol consumption (<0.15, 0.15 to <2.0, 2.0 to 7.5, ≥7.5 g/day), pre-diagnostic total energy intake (quintiles, kcal/day), pre-diagnostic menopausal status, age at menopause, and postmenopausal hormone use (premenopausal, postmenopausal and age at menopause<50 year and never postmenopausal hormone use, postmenopausal and age at menopause<50 year and past postmenopausal hormone use, postmenopausal and age at menopause<50 year and current postmenopausal hormone use, postmenopausal and age at menopause≥50 year and never postmenopausal hormone use, postmenopausal and age at menopause≥50 year and past postmenopausal hormone use, postmenopausal and age at menopause≥50 year and current postmenopausal hormone use, missing), post-diagnostic aspirin use (never, past, current, missing), race (white, other), stage of disease (I, II, III), ER/PR status (ER/PR positive, ER positive and PR negative, ER/PR negative, missing), radiotherapy (yes, no, missing), chemotherapy (yes, no, missing), and hormonal treatment (yes, no, missing).

**Table S6: Four-year time-lagged analysis for fruit and vegetable consumption in relation to mortality after breast cancer diagnosis (n=6,854 women) in the NHS and NHSII.**

|                                   | Consumption Levels |                  |                  |                  |                  | <i>P</i> <sub>trend</sub> |
|-----------------------------------|--------------------|------------------|------------------|------------------|------------------|---------------------------|
|                                   | Quintile 1         | Quintile 2       | Quintile 3       | Quintile 4       | Quintile 5       |                           |
| <b>Total fruit and vegetables</b> |                    |                  |                  |                  |                  |                           |
| Breast cancer-specific mortality  |                    |                  |                  |                  |                  |                           |
| Median intake, serving/day        | 2.0                | 3.3              | 4.3              | 5.5              | 7.7              |                           |
| Number of deaths                  | 125                | 104              | 109              | 127              | 135              |                           |
| Model 1                           | 1                  | 0.81 (0.63-1.06) | 0.85 (0.65-1.09) | 0.99 (0.78-1.27) | 1.07 (0.84-1.36) | 0.19                      |
| Model 2                           | 1                  | 0.79 (0.61-1.03) | 0.86 (0.65-1.12) | 0.97 (0.74-1.27) | 1.05 (0.79-1.40) | 0.29                      |
| All-cause mortality               |                    |                  |                  |                  |                  |                           |
| Number of deaths                  | 438                | 378              | 343              | 324              | 329              |                           |
| Model 1                           | 1                  | 0.85 (0.74-0.97) | 0.78 (0.67-0.89) | 0.75 (0.65-0.86) | 0.77 (0.67-0.89) | 0.0002                    |
| Model 2                           | 1                  | 0.89 (0.77-1.02) | 0.90 (0.78-1.04) | 0.83 (0.71-0.97) | 0.87 (0.74-1.03) | 0.11                      |
| <b>Total fruits</b>               |                    |                  |                  |                  |                  |                           |
| Breast cancer-specific mortality  |                    |                  |                  |                  |                  |                           |
| Median intake, serving/day        | 0.4                | 0.9              | 1.4              | 1.9              | 2.9              |                           |
| Number of deaths                  | 119                | 121              | 106              | 128              | 126              |                           |
| Model 1                           | 1                  | 0.99 (0.77-1.27) | 0.84 (0.65-1.09) | 1.01 (0.79-1.30) | 0.99 (0.77-1.27) | 0.92                      |
| Model 2                           | 1                  | 1.08 (0.83-1.40) | 0.91 (0.70-1.20) | 1.13 (0.86-1.47) | 0.99 (0.75-1.31) | 0.99                      |
| All-cause mortality               |                    |                  |                  |                  |                  |                           |
| Number of deaths                  | 385                | 356              | 331              | 367              | 373              |                           |
| Model 1                           | 1                  | 0.89 (0.77-1.02) | 0.76 (0.65-0.88) | 0.81 (0.70-0.93) | 0.80 (0.69-0.92) | 0.004                     |
| Model 2                           | 1                  | 1.02 (0.88-1.18) | 0.89 (0.77-1.04) | 0.99 (0.85-1.16) | 0.92 (0.79-1.08) | 0.31                      |
| <b>Total vegetables</b>           |                    |                  |                  |                  |                  |                           |
| Breast cancer-specific mortality  |                    |                  |                  |                  |                  |                           |
| Median intake, serving/day        | 1.2                | 2.1              | 2.8              | 3.7              | 5.3              |                           |
| Number of deaths                  | 129                | 107              | 115              | 114              | 135              |                           |
| Model 1                           | 1                  | 0.83 (0.64-1.07) | 0.89 (0.69-1.14) | 0.89 (0.69-1.15) | 1.07 (0.84-1.37) | 0.30                      |
| Model 2                           | 1                  | 0.78 (0.60-1.02) | 0.85 (0.65-1.10) | 0.82 (0.63-1.08) | 1.04 (0.79-1.37) | 0.43                      |
| All-cause mortality               |                    |                  |                  |                  |                  |                           |
| Number of deaths                  | 478                | 372              | 341              | 324              | 297              |                           |
| Model 1                           | 1                  | 0.81 (0.71-0.93) | 0.76 (0.66-0.87) | 0.76 (0.66-0.87) | 0.73 (0.63-0.84) | <0.0001                   |
| Model 2                           | 1                  | 0.85 (0.74-0.98) | 0.83 (0.72-0.96) | 0.80 (0.69-0.93) | 0.84 (0.72-0.99) | 0.04                      |
| <b>Fruit juice Intake</b>         |                    |                  |                  |                  |                  |                           |
| Breast cancer-specific mortality  |                    |                  |                  |                  |                  |                           |
| Median intake, serving/day        | 0                  | 0.2              | 0.7              | 1.5              | 2.1              |                           |
| Number of deaths                  | 100                | 107              | 124              | 123              | 143              |                           |
| Model 1                           | 1                  | 0.88 (0.67-1.15) | 1.01 (0.77-1.31) | 1.05 (0.81-1.37) | 1.21 (0.93-1.56) | 0.02                      |
| Model 2                           | 1                  | 0.92 (0.69-1.21) | 1.05 (0.80-1.37) | 1.12 (0.85-1.47) | 1.34 (1.02-1.76) | 0.004                     |
| All-cause mortality               |                    |                  |                  |                  |                  |                           |
| Number of deaths                  | 343                | 325              | 363              | 391              | 386              |                           |
| Model 1                           | 1                  | 0.81 (0.70-0.95) | 0.84 (0.72-0.97) | 0.87 (0.76-1.01) | 0.89 (0.77-1.03) | 0.71                      |
| Model 2                           | 1                  | 0.93 (0.80-1.09) | 0.96 (0.83-1.12) | 0.99 (0.85-1.14) | 1.08 (0.93-1.26) | 0.14                      |

Model 1 stratified by cohort and adjusted for age at diagnosis (year) and calendar year of diagnosis.

Model 2 stratified by cohort and adjusted for age at diagnosis (year), calendar year of diagnosis, calendar year at start of follow-up of each-2-year questionnaire cycle, pre-diagnostic BMI (<20, 20 to <22.5, 22.5 to <25, 25.0 to <30, 30 to <35, ≥35 kg/m<sup>2</sup>, missing), BMI change after diagnosis (no change (≥-0.5 to ≤0.5 kg/m<sup>2</sup>), decrease (<-0.5 kg/m<sup>2</sup>), increase (>0.5-2 kg/m<sup>2</sup>), increase (>2 kg/m<sup>2</sup>), missing), post-diagnostic smoking (never, past, current 1-14/day, current 15-24/day, current ≥25/day, missing), post-diagnostic physical activity (<5, 5 to <11.5, 11.5 to <22, ≥22 MET-h/week, missing), oral contraceptive use (ever, never), post-diagnostic alcohol consumption (<0.15, 0.15 to <2.0, 2.0 to 7.5, ≥7.5 g/day), post-diagnostic total energy intake (quintiles, kcal/day), pre-diagnostic menopausal status, age at menopause, and postmenopausal hormone use (premenopausal, postmenopausal and age at menopause<50 year and never postmenopausal hormone use, postmenopausal and age at menopause<50 year and past postmenopausal hormone use, postmenopausal and age at menopause<50 year and current postmenopausal hormone use, postmenopausal and age at menopause≥50 year and never postmenopausal hormone use, postmenopausal and age at menopause≥50 year and past postmenopausal hormone use, postmenopausal and age at menopause≥50 year and current postmenopausal hormone use, missing), post-diagnostic aspirin use (never, past, current, missing), race (white, other), stage of disease (I, II, III), ER/PR status (ER/PR positive, ER positive and PR negative, ER/PR negative, missing), radiotherapy (yes, no, missing), chemotherapy (yes, no, missing), and hormonal treatment (yes, no, missing).

**Table S7: First post-diagnostic\* fruit and vegetable consumption in relation to mortality after breast cancer diagnosis in the NHS and NHSII.**

|                                         | Consumption Levels |                  |                  |                  |                  | <i>P</i> <sub>trend</sub> |
|-----------------------------------------|--------------------|------------------|------------------|------------------|------------------|---------------------------|
|                                         | Quintile 1         | Quintile 2       | Quintile 3       | Quintile 4       | Quintile 5       |                           |
| <b>Total fruit and vegetable intake</b> |                    |                  |                  |                  |                  |                           |
| Breast cancer-specific mortality        |                    |                  |                  |                  |                  |                           |
| Median intake, serving/day              | 2.1                | 3.3              | 4.3              | 5.5              | 7.9              |                           |
| Number of deaths                        | 233                | 184              | 228              | 210              | 215              |                           |
| Model 1                                 | 1                  | 0.76 (0.62-0.92) | 0.93 (0.77-1.11) | 0.85 (0.71-1.03) | 0.88 (0.73-1.06) | 0.51                      |
| Model 2                                 | 1                  | 0.76 (0.62-0.92) | 0.96 (0.79-1.17) | 0.86 (0.70-1.05) | 0.93 (0.75-1.16) | 0.95                      |
| All-cause mortality                     |                    |                  |                  |                  |                  |                           |
| Number of deaths                        | 564                | 513              | 500              | 470              | 474              |                           |
| Model 1                                 | 1                  | 0.86 (0.77-0.97) | 0.83 (0.73-0.93) | 0.80 (0.70-0.90) | 0.79 (0.70-0.89) | 0.0002                    |
| Model 2                                 | 1                  | 0.88 (0.78-0.99) | 0.94 (0.82-1.07) | 0.83 (0.73-0.95) | 0.88 (0.76-1.01) | 0.09                      |
| <b>Total fruit intake</b>               |                    |                  |                  |                  |                  |                           |
| Breast cancer-specific mortality        |                    |                  |                  |                  |                  |                           |
| Median intake, serving/day              | 0.4                | 0.9              | 1.4              | 1.9              | 3.0              |                           |
| Number of deaths                        | 219                | 215              | 204              | 197              | 235              |                           |
| Model 1                                 | 1                  | 0.97 (0.80-1.17) | 0.88 (0.73-1.07) | 0.86 (0.71-1.05) | 1.02 (0.85-1.23) | 0.91                      |
| Model 2                                 | 1                  | 1.13 (0.93-1.37) | 1.04 (0.85-1.27) | 0.98 (0.80-1.20) | 1.04 (0.85-1.28) | 0.92                      |
| All-cause mortality                     |                    |                  |                  |                  |                  |                           |
| Number of deaths                        | 522                | 496              | 468              | 489              | 546              |                           |
| Model 1                                 | 1                  | 0.90 (0.80-1.02) | 0.79 (0.70-0.90) | 0.80 (0.71-0.90) | 0.87 (0.77-0.98) | 0.03                      |
| Model 2                                 | 1                  | 1.10 (0.97-1.24) | 0.94 (0.82-1.07) | 0.99 (0.86-1.12) | 0.99 (0.86-1.13) | 0.50                      |
| <b>Total vegetable intake</b>           |                    |                  |                  |                  |                  |                           |
| Breast cancer-specific mortality        |                    |                  |                  |                  |                  |                           |
| Median intake, serving/day              | 1.3                | 2.1              | 2.9              | 3.7              | 5.3              |                           |
| Number of deaths                        | 215                | 219              | 215              | 222              | 199              |                           |
| Model 1                                 | 1                  | 1.00 (0.83-1.20) | 0.97 (0.80-1.17) | 1.00 (0.83-1.21) | 0.90 (0.74-1.09) | 0.29                      |
| Model 2                                 | 1                  | 0.92 (0.76-1.12) | 0.93 (0.76-1.14) | 0.99 (0.81-1.21) | 0.92 (0.74-1.13) | 0.67                      |
| All-cause mortality                     |                    |                  |                  |                  |                  |                           |
| Number of deaths                        | 582                | 535              | 492              | 468              | 444              |                           |
| Model 1                                 | 1                  | 0.93 (0.82-1.04) | 0.86 (0.76-0.97) | 0.84 (0.74-0.95) | 0.80 (0.70-0.90) | 0.0002                    |
| Model 2                                 | 1                  | 0.94 (0.83-1.06) | 0.91 (0.80-1.04) | 0.89 (0.78-1.01) | 0.89 (0.77-1.02) | 0.08                      |
| <b>Fruit juice Intake</b>               |                    |                  |                  |                  |                  |                           |
| Breast cancer-specific mortality        |                    |                  |                  |                  |                  |                           |
| Median intake, serving/day              | 0                  | 0.2              | 0.8              | 1.5              | 2.1              |                           |
| Number of deaths                        | 242                | 155              | 202              | 215              | 250              |                           |
| Model 1                                 | 1                  | 0.88 (0.72-1.08) | 0.91 (0.76-1.10) | 0.96 (0.80-1.16) | 1.12 (0.93-1.33) | 0.09                      |
| Model 2                                 | 1                  | 0.93 (0.76-1.15) | 0.94 (0.77-1.14) | 1.06 (0.87-1.28) | 1.23 (1.02-1.48) | 0.008                     |
| All-cause mortality                     |                    |                  |                  |                  |                  |                           |
| Number of deaths                        | 586                | 351              | 482              | 558              | 536              |                           |
| Model 1                                 | 1                  | 0.88 (0.77-1.00) | 0.90 (0.79-1.01) | 0.95 (0.84-1.06) | 0.96 (0.85-1.08) | 0.88                      |
| Model 2                                 | 1                  | 0.91 (0.79-1.04) | 0.92 (0.81-1.03) | 1.04 (0.92-1.17) | 1.05 (0.93-1.19) | 0.07                      |

\*Dietary intake reported at least one year after diagnosis

Model 1 stratified by cohort and adjusted for age at diagnosis (year) and calendar year of diagnosis.

Model 2 stratified by cohort and adjusted for age at diagnosis (year), calendar year of diagnosis, time between diagnosis and first FFQ (year), calendar year at start of follow-up of each-2-year questionnaire cycle, pre-diagnostic BMI (<20, 20 to <22.5, 22.5 to <25, 25.0 to <30, 30 to <35, ≥35 kg/m<sup>2</sup>, missing), BMI change after diagnosis (no change (≥-0.5 to ≤0.5 kg/m<sup>2</sup>), decrease (<-0.5 kg/m<sup>2</sup>), increase (>0.5-2 kg/m<sup>2</sup>), increase (>2 kg/m<sup>2</sup>), missing), post-diagnostic smoking (never, past, current 1-14 cigarettes/day, current 15-24 cigarettes/day, current ≥25 cigarettes/day, missing), post-diagnostic physical activity (<5, 5 to <11.5, 11.5 to <22, ≥22 MET-h/week, missing), pre-diagnostic oral contraceptive use (ever, never), first post-diagnostic alcohol consumption (<0.15, 0.15 to <2.0, 2.0 to 7.5, ≥7.5 g/day), first post-diagnostic total energy intake (quintiles, kcal/day), pre-diagnostic menopausal status, age at menopause, and postmenopausal hormone use (premenopausal, postmenopausal and age at menopause<50 year and never postmenopausal hormone use, postmenopausal and age at menopause<50 year and past postmenopausal hormone use, postmenopausal and age at menopause<50 year and current postmenopausal hormone use, postmenopausal and age at menopause≥50 year and never postmenopausal hormone use, postmenopausal and age at menopause≥50 year and past postmenopausal hormone use, postmenopausal and age at menopause≥50 year and current postmenopausal hormone use, missing), post-diagnostic aspirin use (never, past, current, missing), race (white, other), stage of disease (I, II, III), ER/PR status (ER/PR positive, ER positive and PR negative, ER/PR negative, missing), radiotherapy (yes, no, missing), chemotherapy (yes, no, missing), and hormonal treatment (yes, no, missing).
